# Supplementary material for: The Impact of Race and Age on Response to Neoadjuvant Therapy and Long-Term Outcomes in Black and White Women with Early-Stage Breast Cancer
Source: PubMed Central journal article supplement (PMC10055663; doi:10.21203/rs.3.rs-2667554/v1), 2023-03-16
Supplement: NIHPPrs2667554v1-supplement-1.pdf [file NIHPPrs2667554v1-supplement-1.pdf]

**Suppl Table 1. Association Between Race and Age and Disease-Free and Overall Survival for Women Treated with Neoadjuvant Chemotherapy**

|                                    | Disease-free Survival |         |                         |         | Overall Survival     |         |                         |         |
|------------------------------------|-----------------------|---------|-------------------------|---------|----------------------|---------|-------------------------|---------|
|                                    | Univariable Analysis  |         | Multivariable Analysis* |         | Univariable Analysis |         | Multivariable Analysis* |         |
|                                    | HR (95% CI)           | P-value | HR (95% CI)             | P-value | HR (95% CI)          | P-value | HR (95% CI)             | P-value |
| <b>young Black vs. young White</b> | 2.19 (1.11-4.32)      | 0.023   | 1.80 (0.83-3.91)        | 0.139   | 2.22 (0.94-5.29)     | 0.070   | 1.56 (0.57-4.26)        | 0.386   |
| <b>young Black vs. older Black</b> | 0.99 (0.57-1.73)      | 0.981   | 0.80 (0.43-1.51)        | 0.498   | 0.78 (0.40-1.52)     | 0.463   | 0.66 (0.31-1.40)        | 0.280   |
| <b>young White vs. older White</b> | 0.86 (0.44-1.68)      | 0.663   | 0.73 (0.35-1.54)        | 0.414   | 0.92 (0.38-2.21)     | 0.845   | 0.92 (0.36-2.61)        | 0.957   |
| <b>older Black vs. older White</b> | 1.90 (1.10-3.28)      | 0.020   | 1.64 (0.92-2.93)        | 0.096   | 2.62 (1.31-5.26)     | 0.007   | 2.31 (1.10-4.82)        | 0.026   |

Abbreviations: 95% CI, 95% Confidence Interval

\*adjusted for stage, grade, subtype, and Charlson Comorbidity Index

| <b>Suppl Table 2. Neoadjuvant Chemotherapy Trial Enrollment by Race and Age</b> |                    |                |                    |                |
|---------------------------------------------------------------------------------|--------------------|----------------|--------------------|----------------|
| Odds Ratio of Enrolling in a NACT Trial Compared to Young White Women           |                    |                |                    |                |
|                                                                                 | Unadjusted Model   |                | Adjusted Model*    |                |
|                                                                                 | <b>OR (95% CI)</b> | <b>P-value</b> | <b>OR (95% CI)</b> | <b>P-value</b> |
| <b>young Black</b>                                                              | 0.43 (0.15-1.21)   | 0.111          | 0.61 (0.17-2.16)   | 0.446          |
| <b>older Black</b>                                                              | 0.34 (0.14-0.80)   | 0.013          | 0.65 (0.23-1.85)   | 0.229          |
| <b>older White</b>                                                              | 0.87 (0.44-1.72)   | 0.682          | 1.24 (0.50-3.13)   | 0.653          |

\*adjusted for stage, subtype, grade, and Charlson Comorbidity Index

| <b>Suppl Table 3. Clinical Trial Enrollment by Race and Age</b>  |                    |                |                    |                |
|------------------------------------------------------------------|--------------------|----------------|--------------------|----------------|
| Odds Ratio of Enrolling in a Trial Compared to Young White Women |                    |                |                    |                |
|                                                                  | Unadjusted Model   |                | Adjusted Model*    |                |
|                                                                  | <b>OR (95% CI)</b> | <b>p value</b> | <b>OR (95% CI)</b> | <b>p value</b> |
| <b>young Black</b>                                               | 0.40 (0.18-0.88)   | 0.024          | 0.34 (0.13-0.90)   | 0.030          |
| <b>older Black</b>                                               | 0.31 (0.19-0.52)   | 0.000          | 0.53 (0.29-0.99)   | 0.045          |
| <b>older White</b>                                               | 0.46 (0.29-0.73)   | 0.001          | 0.85 (0.48-1.53)   | 0.595          |

\*adjusted for stage, subtype, grade, and Charlson Comorbidity Index
